# Supplementary material for: Inhibition of Arachidonate 12/15-Lipoxygenase Improves α-Galactosidase Efficacy in iPSC-Derived Cardiomyocytes from Fabry Patients
Source: PubMed Central journal article supplement (PMC5983630; doi:10.3390/ijms19051480), 2018-05-16
Supplement: ijms-19-01480-s001.pdf [file ijms-19-01480-s001.pdf]

Supplementary

# Inhibition of Arachidonate 12/15-Lipoxygenase Improves $\alpha$ -Galactosidase Efficacy in iPSC-Derived Cardiomyocytes from Fabry Patients

Shih-Jie Chou <sup>1,†</sup>, Yueh Chien <sup>1,2,†</sup>, Yuh-Lih Chang <sup>1,3</sup>, Hsin-Bang Leu <sup>4,5,6</sup>, Yi-Ping Yang <sup>2</sup>, Ping-Hsing Tsai <sup>2,4</sup>, Ying-Hsiu Lai <sup>2</sup>, Kuan-Hsuan Chen <sup>3,4</sup>, Wei-Chao Chang <sup>7,8,9</sup>, Shih-Hsien Sung <sup>4,6</sup> and Wen-Chung Yu <sup>4,6,\*</sup>

<sup>1</sup> Institute of Pharmacology, School of Medicine, National Yang-Ming University, Taipei, 11217, Taiwan; ohyeahchou@gmail.com (S.-J.C.); g39005005@gmail.com (Y.C.); ylchang@vghtpe.gov.tw (Y.-L.C.)

<sup>2</sup> Department of Medical Research, Taipei Veterans General Hospital, Taipei, 11217, Taiwan; molly0103@gmail.com (Y.-P.Y.); figatsai@gmail.com (P.-H.T.); d49405004@gmail.com (Y.-H.L.)

<sup>3</sup> Department of Pharmacology, Taipei Veterans General Hospital, Taipei, 11217, Taiwan; sharkshine@gmail.com

<sup>4</sup> Institute of Clinical Medicine, School of Medicine, National Yang-Ming University, Taipei, 11217, Taiwan; hsinbangleu@gmail.com (H.-B.L.); mr.sungsh@gmail.com (S.-H.S.)

<sup>5</sup> Health Care and Management Center, Taipei Veterans General Hospital, Taipei, 11217, Taiwan

<sup>6</sup> Division of Cardiology, Department of Medicine, Taipei Veterans General Hospital, Taipei, 11217, Taiwan

<sup>7</sup> Center for Molecular Medicine, China Medical University Hospital, Taichung, 40447, Taiwan; T21443@mail.cmuh.org.tw

<sup>8</sup> Graduate Institute of Cancer Biology and Center for Molecular Medicine, China Medical University, Taichung, 40447, Taiwan

<sup>9</sup> Department of Biotechnology, Asia University, Taichung, 41354, Taiwan

\* Correspondence: wcyu@vghtpe.gov.tw; Tel.: +886-2-28757394; Fax: +886-2-28757396

† These authors contributed equally to this work.

Supplemental  
Figure 1

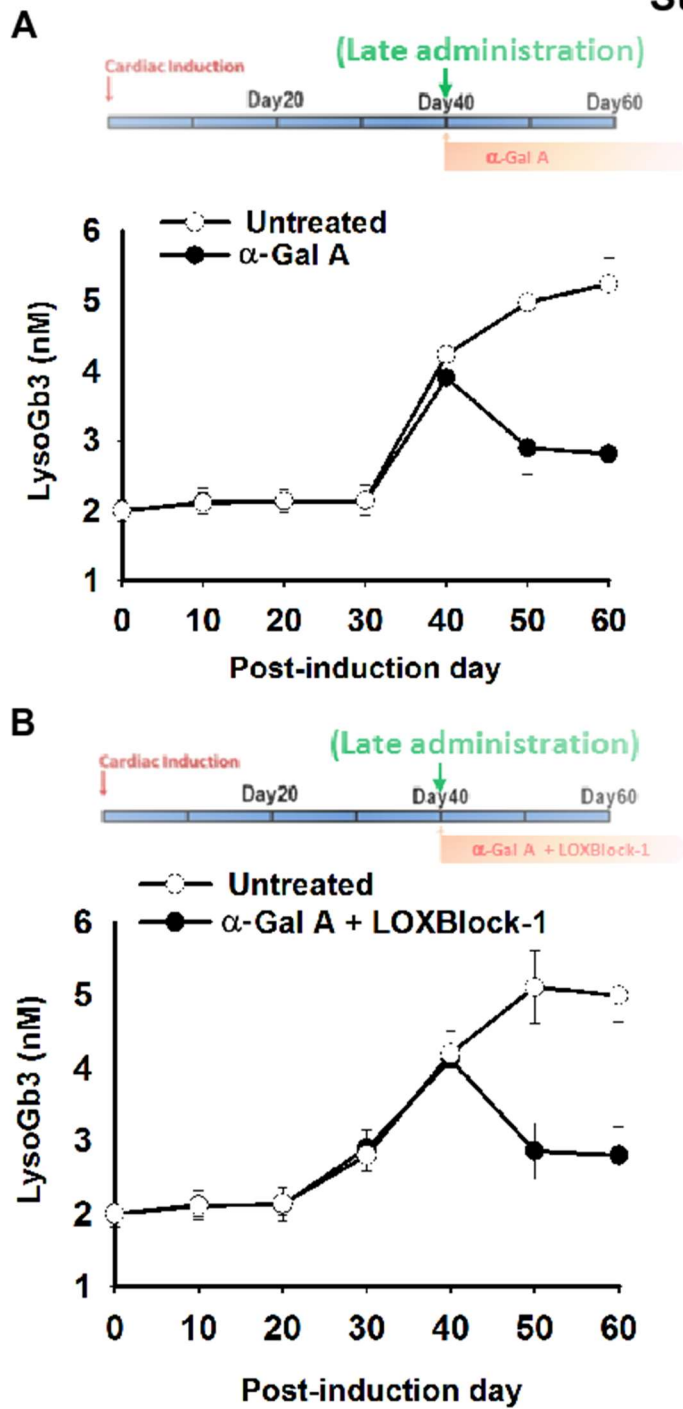

**Supplemental Figure 1.** Effect of late administration of alpha galactosidase plus Alox12/15 pharmacological inhibitor on lysoGb3 release. LysoGb3 release from FC-iPSC-CMs receiving (A) late-administration of either alpha galactosidase alone or (B) a combination of GLA and LOXBlock-1, was measured.

**Supplemental Table S1.** List of RT-PCR primers

| <b>The sequences of the primers for quantitative RT-PCR</b> |                                                          |                      |                     |
|-------------------------------------------------------------|----------------------------------------------------------|----------------------|---------------------|
| Gene<br>(Accession No.)                                     | Primer Sequence<br>(5' to 3')                            | Product<br>size (bp) | T <sub>m</sub> (°C) |
| hOCT4<br>NM_001159542.1                                     | F: CTCAGGCACTGTGTTTCATTG<br>R: TTTGGCTGAACACCTTCCCA      | 672                  | 60                  |
| hSOX2<br>NM_003106.3                                        | F:GCCCTGCAGTACAACCTCCAT<br>R:TTCCTGCAAAGCTCCTACCG        | 735                  | 60                  |
| hNANOG<br>NM_024865.2                                       | F:GAAGACAAGGTCCCGGTCAA<br>R:GGATTCAGCCAGTGTCCAGA         | 709                  | 60                  |
| REX1<br>NM_174900.3                                         | F:GTGGGCCTTATGTGATGGCT<br>R:TGCGTTAGGATGTGGGCTTT         | 759                  | 60                  |
| hDPPA2<br>NM_138815.3                                       | F:CCGTCCCCGCAATCTCCTTCCATC<br>R:ATGATGCCAACATGGCTCCCGGTG | 606                  | 60                  |
| hDppa4<br>NM_018189.3                                       | F:TAGCACAGCAAAGAGGCCA<br>R:TGCATGGCCATAAACAGGT           | 635                  | 60                  |
| hDppa5<br>NM_001025290.2                                    | F:CGGCACGTAGACATATCCCG<br>R:GGCTTCATTGCATTGGCTGG         | 366                  | 60                  |
| hGDF3<br>NM_020634.1                                        | F:GTTTGTGTTGCGGTCAGTCC<br>R:TTGGTGGGGATACACACAGC         | 501                  | 60                  |
| hGAPDH<br>NM_002046.5                                       | F:GTCGCCAGCCGAGCCACATC<br>R:CCAGGCGCCCAATACGACCA         | 83                   | 60                  |
| hANF<br>NM_006172.3                                         | F:GCCTAGGGACAGACTGCAAG<br>R:GGCGAGGAAGTCACCATCAA         | 170                  | 60                  |
| hACTA1<br>NM_001100.3                                       | F:CAGGGCGTCATGGTCGGT<br>R:GTGCCAGATCTTCTCCATGTCATC       | 141                  | 60                  |
| hMYL2<br>NM_000432.3                                        | F:CTCATCTCTCTCCCCGAGT<br>R:TGGAACATGGCCTCTGGATG          | 161                  | 60                  |
| hMYL7<br>NM_021223.2                                        | F:GGAGTTCAAAGAAGCCTTCAGC<br>R:CTCCTCTGGGACACTCACCT       | 112                  | 60                  |

**Supplemental Table S2.** List of proteins tested by antibodies

| Protein           | Assay     | Antibody | Origin                     | Dilution         | Incubation period |
|-------------------|-----------|----------|----------------------------|------------------|-------------------|
| GAPDH             | WB        | rpab     | Ab9385, Abcam, Inc         | 1:5000           | 60 min            |
| OCT3/4            | IF        | rpab     | #2840, Cell Signaling, Inc | 1:400            | O.N.              |
| NANOG             | IF        | rpab     | #3580, Cell Signaling, Inc | 1:800            | O.N.              |
| TRA 1-60          | IF        | mmab     | #4746, Cell signaling, Inc | 1:1000           | O.N.              |
| TRA 1-81          | IF        | mmab     | #4745, Cell Signaling, Inc | 1:1000           | O.N.              |
| SMA               | IF        | rpab     | Ab52218, Abcam, Inc        | 1:500            | O.N.              |
| NF                | IF        | mmab     | MAB1615, Millipore, Inc    | 1:200            | O.N.              |
| AFP               | IF        | mmab     | #3903, Cell Signaling, Inc | 1:100            | O.N.              |
| HNF3 $\beta$      | IF        | rpab     | Sc-20692, Santa Cruz, Inc  | 1:200            | O.N.              |
| NESTIN            | IF        | rpab     | ABD69, Millipore, Inc      | 1:500            | O.N.              |
| $\alpha$ -ACTININ | IF        | mmab     | Ab9465, Abcam, Inc         | 1:200            | O.N.              |
| MYL2              | IF        | rpab     | Ab79935, Abcam, Inc        | 1:200            | O.N.              |
| MYL7              | IF        | mmab     | Ab68086, Abcam, Inc        | 1:200            | O.N.              |
| cTNT              | IF        | mmab     | Ab10214, Abcam, Inc        | 1:200            | O.N.              |
| GLA               | WB        | rpab     | GTX101178, GeneTex, Inc    | 1:1000           | 60 min            |
| Crystallin A3     | WB        | rpab     | GTX109207, GeneTex, Inc    | 1:1000           | 60 min            |
| Crystallin A4     | WB        | rpab     | GTX109526, GeneTex, Inc    | 1:1000           | 60 min            |
| ALOX12            | WB,<br>IF | rpab     | PA5-26020, Thermo, Inc     | 1:1000,<br>1:200 | 60 min,<br>O.N.   |
| ALOX15            | WB,<br>IF | mmab     | Ab119774, Abcam, Inc       | 1:200            | 60 min,<br>O.N.   |
| $\alpha$ -TUBULIN | IF        | rpab     | #5568, Cell Signaling, Inc | 1:10000          | 60 min            |

Abbreviations: WB, Western blot; mmab, mouse monoclonal antibody; rpab, rabbit polyclonal antibody; IF, immunofluorescence; O.N.: over night.
